# Supplementary material
Source: PubMed Central journal article supplement (PMC5555580)
Supplement: NIHMS885145-supplement-supp.pdf [file NIHMS885145-supplement-supp.pdf]

## ONLINE SUPPLEMENT

**Supplemental Table 1. Categorization of unique histopathologic interpretations as usual interstitial pneumonia (UIP), possible UIP/Unclassifiable pulmonary fibrosis, or not UIP**

|                                 | Pathology Designation |              |                                                                                                                                                                                                                                                                                                                                                                                                                                                                                                                                                                                                                                                                                                                                                                   |                                                                                                                                                                                                                                                                                                                                                                                                                                                                                                      |                                                                                                                                                                                                                                                                                                                                                                                                                                                                                                                                                                                                                                                                                                                                                                                                                                                                                                                                                             |                                                                                                                       |
|---------------------------------|-----------------------|--------------|-------------------------------------------------------------------------------------------------------------------------------------------------------------------------------------------------------------------------------------------------------------------------------------------------------------------------------------------------------------------------------------------------------------------------------------------------------------------------------------------------------------------------------------------------------------------------------------------------------------------------------------------------------------------------------------------------------------------------------------------------------------------|------------------------------------------------------------------------------------------------------------------------------------------------------------------------------------------------------------------------------------------------------------------------------------------------------------------------------------------------------------------------------------------------------------------------------------------------------------------------------------------------------|-------------------------------------------------------------------------------------------------------------------------------------------------------------------------------------------------------------------------------------------------------------------------------------------------------------------------------------------------------------------------------------------------------------------------------------------------------------------------------------------------------------------------------------------------------------------------------------------------------------------------------------------------------------------------------------------------------------------------------------------------------------------------------------------------------------------------------------------------------------------------------------------------------------------------------------------------------------|-----------------------------------------------------------------------------------------------------------------------|
|                                 | Definite/Probable UIP |              | Possible UIP/Unclassifiable pulmonary fibrosis                                                                                                                                                                                                                                                                                                                                                                                                                                                                                                                                                                                                                                                                                                                    |                                                                                                                                                                                                                                                                                                                                                                                                                                                                                                      | Not UIP                                                                                                                                                                                                                                                                                                                                                                                                                                                                                                                                                                                                                                                                                                                                                                                                                                                                                                                                                     |                                                                                                                       |
|                                 | UCSF (n=113)          | Mayo (n=111) | UCSF (n=26)                                                                                                                                                                                                                                                                                                                                                                                                                                                                                                                                                                                                                                                                                                                                                       | Mayo (n=7)                                                                                                                                                                                                                                                                                                                                                                                                                                                                                           | UCSF (n=246)                                                                                                                                                                                                                                                                                                                                                                                                                                                                                                                                                                                                                                                                                                                                                                                                                                                                                                                                                | Mayo (n=48)                                                                                                           |
| <b>Pathology Interpretation</b> | UIP                   | UIP          | <ul style="list-style-type: none"> <li>• Fibrosing interstitial pneumonia – unclassifiable<br/><u>Clinical diagnosis (n=23)</u>:                             <ul style="list-style-type: none"> <li>○ IPF, n=5</li> <li>○ HP, n=2</li> <li>○ SR-ILD, n=1</li> </ul>                             Unclassifiable, n=12                             <ul style="list-style-type: none"> <li>○ UCTD, n=3</li> </ul> </li> <li>• UIP + Bronchiolocentric fibrosis                             <ul style="list-style-type: none"> <li>○ <u>Clinical diagnosis (n=3)</u>:                                     <ul style="list-style-type: none"> <li>○ IPF, n=1</li> <li>○ Antisynthetase syndrome, n=1</li> <li>○ Unclassifiable, n=1</li> </ul> </li> </ul> </li> </ul> | <ul style="list-style-type: none"> <li>• Diffuse interstitial fibrosis, n=1</li> <li>• Fibrosing interstitial pneumonia with mixed UIP and DIP features, n=2</li> <li>• Possible UIP with airspace disease with possible aspiration/infection, n=1</li> <li>• Interstitial subpleural and bronchiolocentric fibrosis and chronic inflammation, n=1</li> <li>• possible UIP with severe emphysema and pleural fibrosis with foreign body reaction, n=1</li> <li>• UIP with granulomas, n=1</li> </ul> | <ul style="list-style-type: none"> <li>• UIP + organizing pneumonia (n=1, clinical diagnosis RA-ILD)</li> <li>• Fibrosing interstitial pneumonia – unclassifiable, Bronchiolocentric fibrosis (n=1, clinical diagnosis Unclassifiable ILD)</li> <li>• UIP, Bronchiolocentric fibrosis, Non-necrotizing granulomatous inflammation –Favor HP</li> <li>• UIP, Non-necrotizing granulomatous inflammation – Favor HP</li> <li>• Interstitial fibrosis with extramedullary hematopoiesis</li> <li>• Acute bronchopneumonia</li> <li>• Amyloidosis/LCDD</li> <li>• Aspiration</li> <li>• Bland DAH</li> <li>• Bronchiolocentric fibrosis</li> <li>• Bronchiolocentric fibrosis, non-necrotizing granulomatous inflammation</li> <li>• Cellular bronchiolitis</li> <li>• Cellular interstitial pneumonia</li> <li>• Constrictive bronchiolitis</li> <li>• DAD/ALI</li> <li>• DIP</li> <li>• Eosinophilic pneumonia</li> <li>• Follicular bronchiolitis</li> </ul> | <ul style="list-style-type: none"> <li>• DIP</li> <li>• HP</li> <li>• Mixed Unclassifiable</li> <li>• NSIP</li> </ul> |

|  |  |  |  |  |                                                                                                                                                                                                                                                                                                                                                                                                                                                                                                                                                                                                                                                                        |  |
|--|--|--|--|--|------------------------------------------------------------------------------------------------------------------------------------------------------------------------------------------------------------------------------------------------------------------------------------------------------------------------------------------------------------------------------------------------------------------------------------------------------------------------------------------------------------------------------------------------------------------------------------------------------------------------------------------------------------------------|--|
|  |  |  |  |  | <ul style="list-style-type: none"> <li>• LIP</li> <li>• NSIP – cellular</li> <li>• NSIP – cellular &amp; fibrotic</li> <li>• NSIP – cellular with granulomas</li> <li>• NSIP – fibrotic</li> <li>• Necrotizing granulomas</li> <li>• Non-necrotizing granulomatous inflammation</li> <li>• Normal</li> <li>• OP</li> <li>• OP, Emphysema</li> <li>• Other Granulomatous Disease</li> <li>• Pleuritis</li> <li>• Pulmonary alveolar proteinosis</li> <li>• RB</li> <li>• RB, OP</li> <li>• Adenocarcinoma</li> <li>• Apical fibrous cap</li> <li>• Diffuse panbronchiolitis</li> <li>• Increased macrophages, apical fibrosis</li> <li>• other bronchiolitis</li> </ul> |  |
|--|--|--|--|--|------------------------------------------------------------------------------------------------------------------------------------------------------------------------------------------------------------------------------------------------------------------------------------------------------------------------------------------------------------------------------------------------------------------------------------------------------------------------------------------------------------------------------------------------------------------------------------------------------------------------------------------------------------------------|--|

**Supplemental Table 2. Histopathologic interpretation and final clinical diagnosis of the 24 patients with HRCT possible UIP pattern but not definite/probable UIP on surgical lung biopsy in the derivation cohort and validation cohorts**

| <b>UCSF (n=24)</b> | <b>Histopathologic Interpretation</b>                                              | <b>Final Clinical Diagnosis</b> |
|--------------------|------------------------------------------------------------------------------------|---------------------------------|
|                    | Bronchiolocentric fibrosis, Non-necrotizing granulomatous inflammation – Favor HP  | HP                              |
|                    | Non-necrotizing granulomatous inflammation – Favor HP                              | HP                              |
|                    | Organizing pneumonia                                                               | HP                              |
|                    | NSIP with granulomas (suggest HP)                                                  | HP                              |
|                    | UIP, Bronchiolocentric fibrosis                                                    | IPF                             |
|                    | Non-necrotizing granulomatous inflammation – Favor HP                              | HP                              |
|                    | Bronchiolocentric fibrosis                                                         | HP                              |
|                    | Fibrosing interstitial pneumonia – unclassifiable                                  | IPF                             |
|                    | Bronchiolocentric fibrosis                                                         | HP                              |
|                    | Necrotizing granulomas                                                             | ANCA-associated vasculitis      |
|                    | Fibrosing interstitial pneumonia – unclassifiable                                  | Unclassifiable ILD              |
|                    | Fibrotic NSIP                                                                      | HP                              |
|                    | Fibrotic NSIP                                                                      | Unclassifiable ILD              |
|                    | Fibrotic NSIP                                                                      | Idiopathic NSIP                 |
|                    | NSIP with granulomas (suggest HP)                                                  | HP                              |
|                    | Fibrotic NSIP                                                                      | UCTD                            |
|                    | Fibrosing interstitial pneumonia – unclassifiable                                  | IPF                             |
|                    | Fibrotic NSIP                                                                      | UCTD                            |
|                    | NSIP with granulomas (suggest HP)                                                  | HP                              |
|                    | UIP, Bronchiolocentric fibrosis                                                    | Antisynthetase syndrome         |
|                    | Fibrosing interstitial pneumonia – unclassifiable                                  | Unclassifiable ILD              |
|                    | Fibrosing interstitial pneumonia – unclassifiable                                  | Unclassifiable ILD              |
|                    | Fibrosing interstitial pneumonia – unclassifiable                                  | IPF                             |
|                    | Fibrotic NSIP                                                                      | Antisynthetase syndrome         |
| Mayo (n=4)         | Possible UIP with severe emphysema and pleural fibrosis with foreign body reaction | IPF                             |
|                    | HP                                                                                 | HP                              |
|                    | HP                                                                                 | HP                              |
|                    | Possible UIP with airspace disease with possible aspiration, infection             | IPF                             |

**Supplemental Table 3.** Individual features of inconsistent with UIP pattern on  
HRCT

|                                         | Histopathologic Diagnosis          |                                                            | Odds Ratio*<br>(95% CI) | P-value* |
|-----------------------------------------|------------------------------------|------------------------------------------------------------|-------------------------|----------|
|                                         | Definite/<br>Probable UIP<br>n (%) | Possible UIP,<br>Unclassifiable PF, or Not<br>UIP<br>n (%) |                         |          |
| <b>Mosaic perfusion/Air-trapping</b>    |                                    |                                                            |                         |          |
| <u>UCSF</u>                             |                                    |                                                            |                         |          |
| Yes                                     | 24 (27.3)                          | 64 (72.7)                                                  | 0.80                    | 0.46     |
| No                                      | 49 (21.0)                          | 184 (79.0)                                                 | (0.45-1.43)             |          |
| <u>Mayo</u>                             |                                    |                                                            |                         |          |
| Yes                                     | 15 (46.9)                          | 17 (53.1)                                                  | 0.48                    | 0.16     |
| No                                      | 29 (46.0)                          | 34 (54.0)                                                  | (0.17-1.34)             |          |
| <b>Micronodules</b>                     |                                    |                                                            |                         |          |
| <u>UCSF</u>                             |                                    |                                                            |                         |          |
| Yes                                     | 1 (2.4)                            | 40 (97.6)                                                  | 0.07                    | 0.008    |
| No                                      | 72 (25.7)                          | 208 (74.3)                                                 | (0.01-0.50)             |          |
| <u>Mayo</u>                             |                                    |                                                            |                         |          |
| Yes                                     | 0 (0)                              | 11 (100)                                                   | --                      | --       |
| No                                      | 44 (52.4)                          | 40 (47.6)                                                  |                         |          |
| <b>Ground glass opacities</b>           |                                    |                                                            |                         |          |
| <u>UCSF</u>                             |                                    |                                                            |                         |          |
| Yes                                     | 27 (17.9)                          | 124 (82.1)                                                 | 0.39                    | <0.001   |
| No                                      | 46 (27.1)                          | 124 (72.9)                                                 | (0.23-0.66)             |          |
| <u>Mayo</u>                             |                                    |                                                            |                         |          |
| Yes                                     | 19 (33.9)                          | 37 (66.1)                                                  | 0.09                    | <0.001   |
| No                                      | 25 (64.1)                          | 14 (35.9)                                                  | (0.04-0.23)             |          |
| <b>Consolidation</b>                    |                                    |                                                            |                         |          |
| <u>UCSF</u>                             |                                    |                                                            |                         |          |
| Yes                                     | 3 (10.7)                           | 25 (89.3)                                                  | 0.27                    | <0.001   |
| No                                      | 70 (23.9)                          | 223 (76.1)                                                 | (0.08-0.95)             |          |
| <u>Mayo</u>                             |                                    |                                                            |                         |          |
| Yes                                     | 3 (60.0)                           | 2 (40.0)                                                   | 0.54                    | 0.54     |
| No                                      | 41 (45.6)                          | 49 (54.4)                                                  | (0.07-3.85)             |          |
| <b>Cysts</b>                            |                                    |                                                            |                         |          |
| <u>UCSF</u>                             |                                    |                                                            |                         |          |
| Yes                                     | 9 (34.6)                           | 17 (65.4)                                                  | 1.33                    | 0.53     |
| No                                      | 64 (21.7)                          | 231 (78.3)                                                 | (0.55-3.23)             |          |
| <u>Mayo</u>                             |                                    |                                                            |                         |          |
| Yes                                     | 1 (100.0)                          | 0 (0)                                                      | --                      | --       |
| No                                      | 43 (45.7)                          | 51 (54.3)                                                  |                         |          |
| <b>Upper-mid lung predominance</b>      |                                    |                                                            |                         |          |
| <u>UCSF</u>                             |                                    |                                                            |                         |          |
| Yes                                     | 8 (13.3)                           | 52 (86.7)                                                  | 0.44                    | 0.053    |
| No                                      | 65 (24.9)                          | 196 (75.1)                                                 | (0.19-1.01)             |          |
| <u>Mayo</u>                             |                                    |                                                            |                         |          |
| Yes                                     | 12 (46.2)                          | 14 (53.8)                                                  | 0.22                    | 0.004    |
| No                                      | 32 (46.4)                          | 37 (53.6)                                                  | (0.08-0.62)             |          |
| <b>Peribronchovascular distribution</b> |                                    |                                                            |                         |          |
| <u>UCSF</u>                             |                                    |                                                            |                         |          |
| Yes                                     | 33 (19.6)                          | 135 (80.4)                                                 | 0.54                    | 0.017    |
| No                                      | 40 (26.1)                          | 113 (73.9)                                                 | (0.33-0.90)             |          |
| <u>Mayo</u>                             |                                    |                                                            |                         |          |
| Yes                                     | 7 (43.8)                           | 9 (33.1)                                                   | 0.19                    | 0.009    |
| No                                      | 37 (46.8)                          | 42 (53.2)                                                  | (0.05-0.66)             |          |

\*Odds ratio and p-value for association with histopathologic definite/probable UIP

pattern using logistic regression adjusted for the other inconsistent features

Abbreviations: UIP = usual interstitial pneumonia, HRCT = high-resolution computed tomography, PF = pulmonary fibrosis; CI = confidence interval

**Supplemental Table 4. Test characteristics by UIP score for histopathologic UIP**

|                                          | <b>UCSF<br/>(n=385)</b> |                | <b>Mayo Clinic<br/>(n=167)</b> |                |
|------------------------------------------|-------------------------|----------------|--------------------------------|----------------|
| <b>Prevalence of histopathologic UIP</b> | 29%                     |                | 67%                            |                |
| <b>UIP Score</b>                         | <b>LR+</b>              | <b>PPV (%)</b> | <b>LR+</b>                     | <b>PPV (%)</b> |
| 1                                        | 1.16                    | 32             | 1.17                           | 70             |
| 2                                        | 1.27                    | 35             | 1.40                           | 74             |
| 3                                        | 1.52                    | 39             | 1.59                           | 76             |
| 4                                        | 2.30                    | 49             | 3.65                           | 88             |
| 6                                        | 5.33                    | 69             | 14.12                          | 97             |
| 7                                        | 5.74                    | 70             | 13.87                          | 97             |
| 8                                        | 6.22                    | 72             | 13.63                          | 96             |
| 9                                        | 6.02                    | 71             | 12.64                          | 96             |
| 10                                       | 45.7                    | 95             | 17.84                          | 97             |
| <b>C-statistic (95% CI)</b>              | 0.74 (0.69-0.78)        |                | 0.83 (0.76-0.89)               |                |

\*The UIP score is calculated as follows: Age 50-59 (+2 points) or Age  $\geq$ 60 (+3 points), Male sex (+1 points), HRCT Possible UIP pattern with total traction bronchiectasis score  $\geq$  4 (+6 points) for a total of 10 possible points

Abbreviations: LR+, likelihood ratio for a positive test; PPV, positive predictive value; NPV, negative predictive value; UIP, usual interstitial pneumonitis

**Supplemental Table 5. Sensitivity analyses included (1) including cases with possible UIP/unclassifiable PF on histopathology as “positive” outcomes (i.e. equivalent to definite/probable UIP cases), (2) using a clinical diagnosis of IPF rather than histopathologic UIP as the outcome, and (3) inclusion of patients with diagnosis of a defined CTD prior to biopsy who were excluded from the primary analysis.**

| <b>Sensitivity Analysis</b>                                                                                                                                                          | <b>PPV<br/>(95% CI)</b> | <b>LR+<br/>(95% CI)</b> |
|--------------------------------------------------------------------------------------------------------------------------------------------------------------------------------------|-------------------------|-------------------------|
| Population: Primary study population<br>Outcome: pathology UIP includes possible UIP/unclassifiable PF<br>Predictor: HRCT Possible UIP pattern                                       | 75.0<br>(62.6-85.0)     | 5.31<br>(3.14-8.99)     |
| Population: Primary study population<br>Outcome: pathology UIP includes possible UIP/unclassifiable PF<br>Predictor: HRCT Possible UIP pattern + traction score $\geq 4$             | 80.0<br>(65.4-80.4)     | 7.08<br>(3.51-14.3)     |
| Population: Primary study population<br>Outcome: IPF<br>Predictor: HRCT Possible UIP pattern                                                                                         | 60.9<br>(47.9-72.9)     | 4.70<br>(3.01-7.34)     |
| Population: Primary study population<br>Outcome: IPF<br>Predictor: HRCT Possible UIP pattern + traction score $\geq 4$                                                               | 66.7<br>(51.0-80.0)     | 6.02<br>(3.39-10.7)     |
| Population: Primary study population plus<br>patients with CTD diagnosis prior to biopsy<br>Outcome: pathology UIP<br>Predictor: HRCT Possible UIP pattern                           | 61.5<br>(48.6-73.3)     | 4.05<br>(2.58-6.35)     |
| Population: Primary study population plus<br>patients with CTD diagnosis prior to biopsy<br>Outcome: pathology UIP<br>Predictor: HRCT Possible UIP pattern + traction score $\geq 4$ | 68.9<br>(53.4-81.8)     | 5.60<br>(3.1-10.1)      |

**Supplemental Table 6. Diagnostic characteristics of HRCT Possible UIP pattern for pathologic UIP by individual radiologist for the primary analysis**

| <b>Radiologist</b> | <b>Sensitivity</b>  | <b>Specificity</b>  | <b>PPV</b>          | <b>NPV</b>          | <b>AUROC</b>        | <b>LR+</b>          |
|--------------------|---------------------|---------------------|---------------------|---------------------|---------------------|---------------------|
| 1                  | 35.4<br>(26.6-45.0) | 91.2<br>(87.2-94.3) | 62.5<br>(49.5-74.3) | 77.3<br>(72.3-81.7) | 0.63<br>(0.58-0.68) | 4.01<br>(2.54-6.33) |
| 2                  | 40.7<br>(31.6-50.4) | 91.9<br>(88.0-94.9) | 67.6<br>(55.2-78.5) | 78.9<br>(74.0-83.2) | 0.66<br>(0.61-0.71) | 5.03<br>(3.18-7.96) |

Abbreviations: HRCT, high resolution computed tomography; PPV, positive predictive value; NPV, negative predictive value; AUROC, area under receiver operating curve; LR+, likelihood ratio of positive test; UIP, usual interstitial pneumonitis



Supplemental Figure 1.

a.

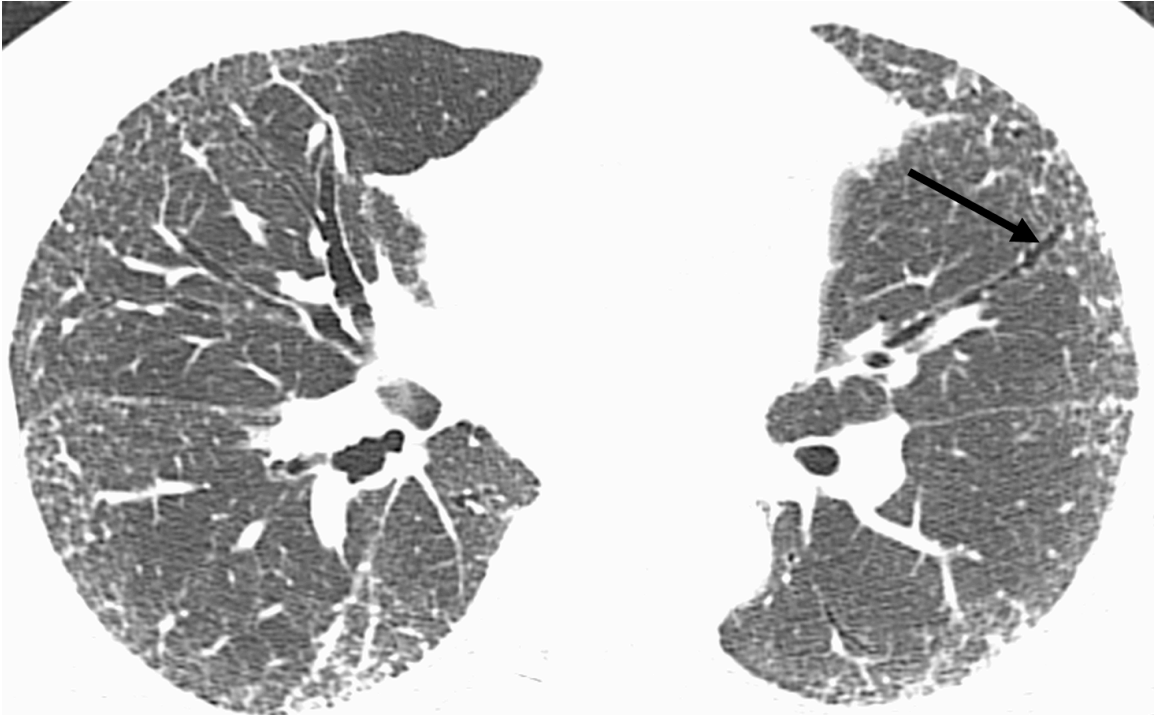

b.

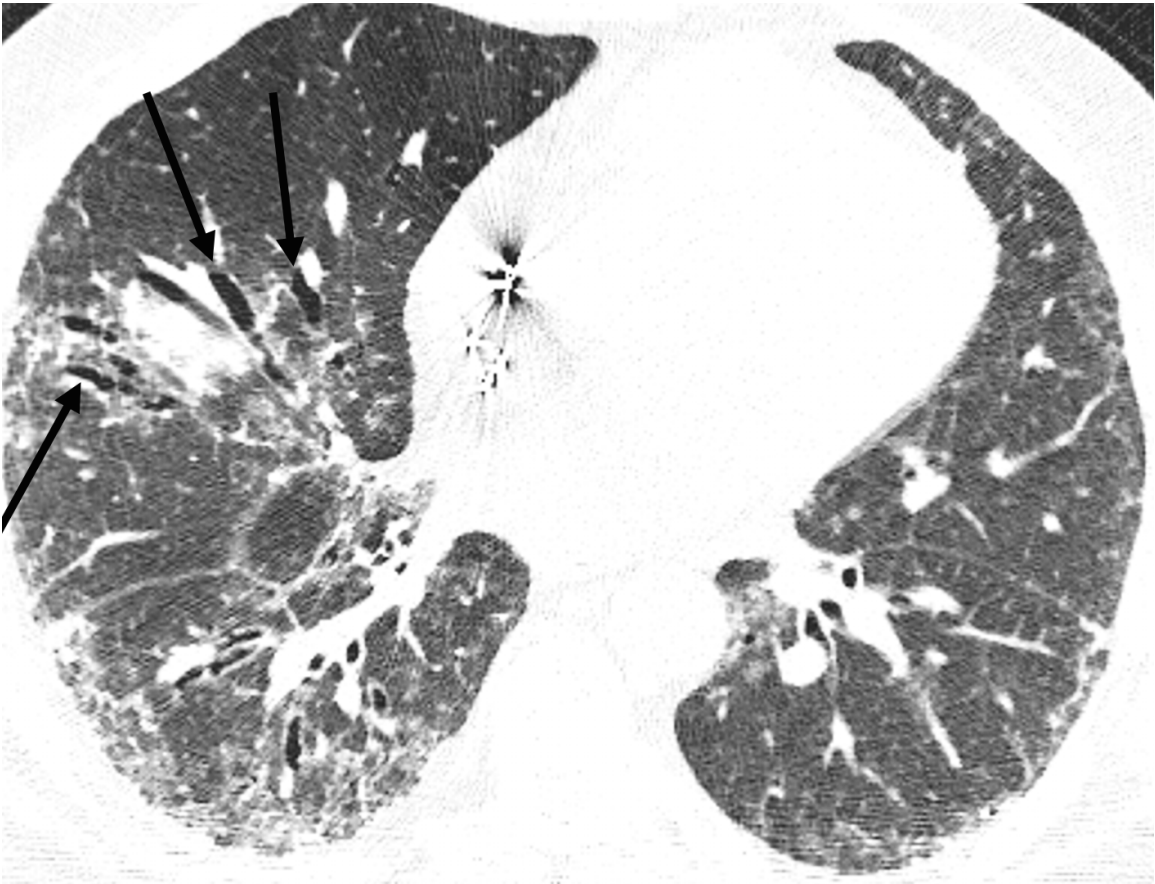

**c.**

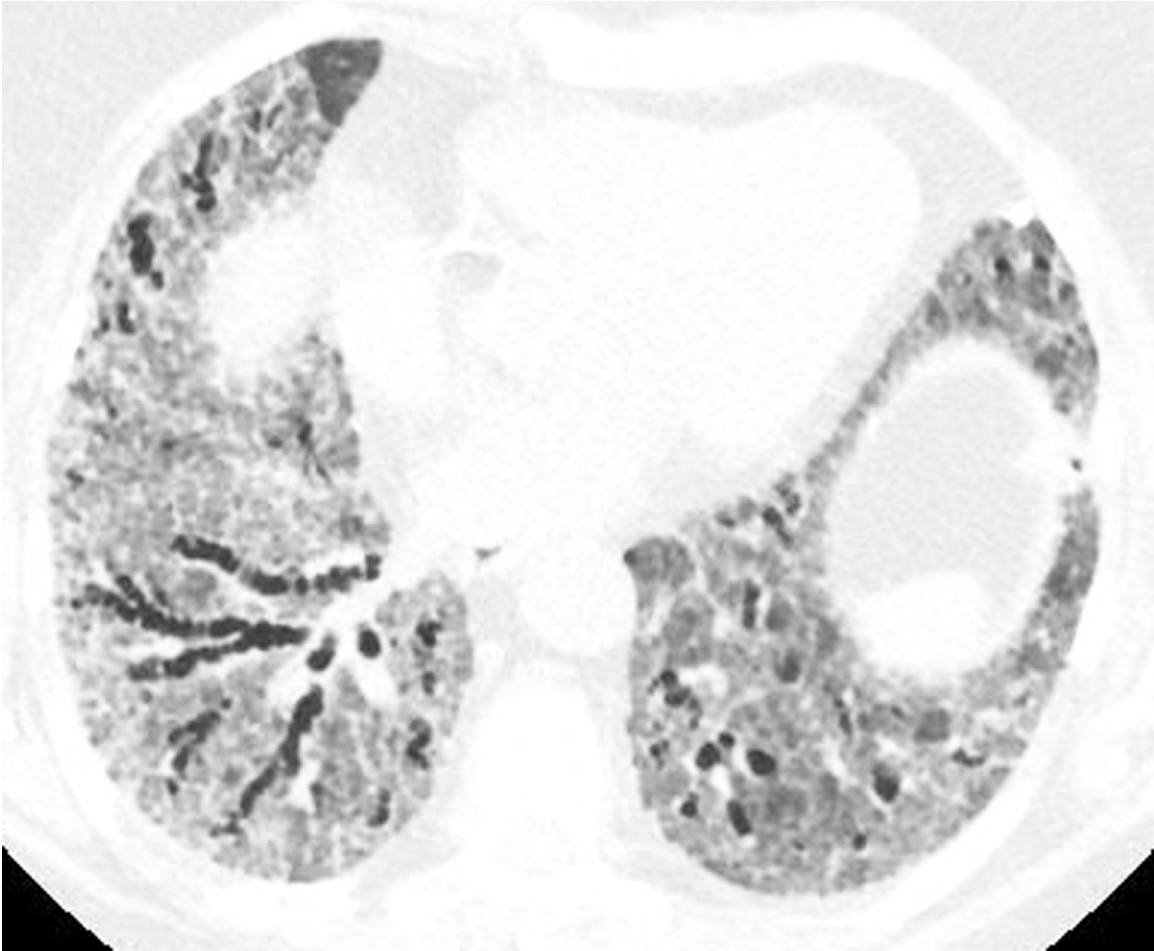

**Figure 1a**-Mild Traction Bronchiectasis (traction score for lobe = 1)

**Figure 1b**-Moderate Traction Bronchiectasis (traction score for lobe = 2)

**Figure 1c**-Severe Traction Bronchiectasis (traction score for lobe = 3)

Supplemental Figure 2.

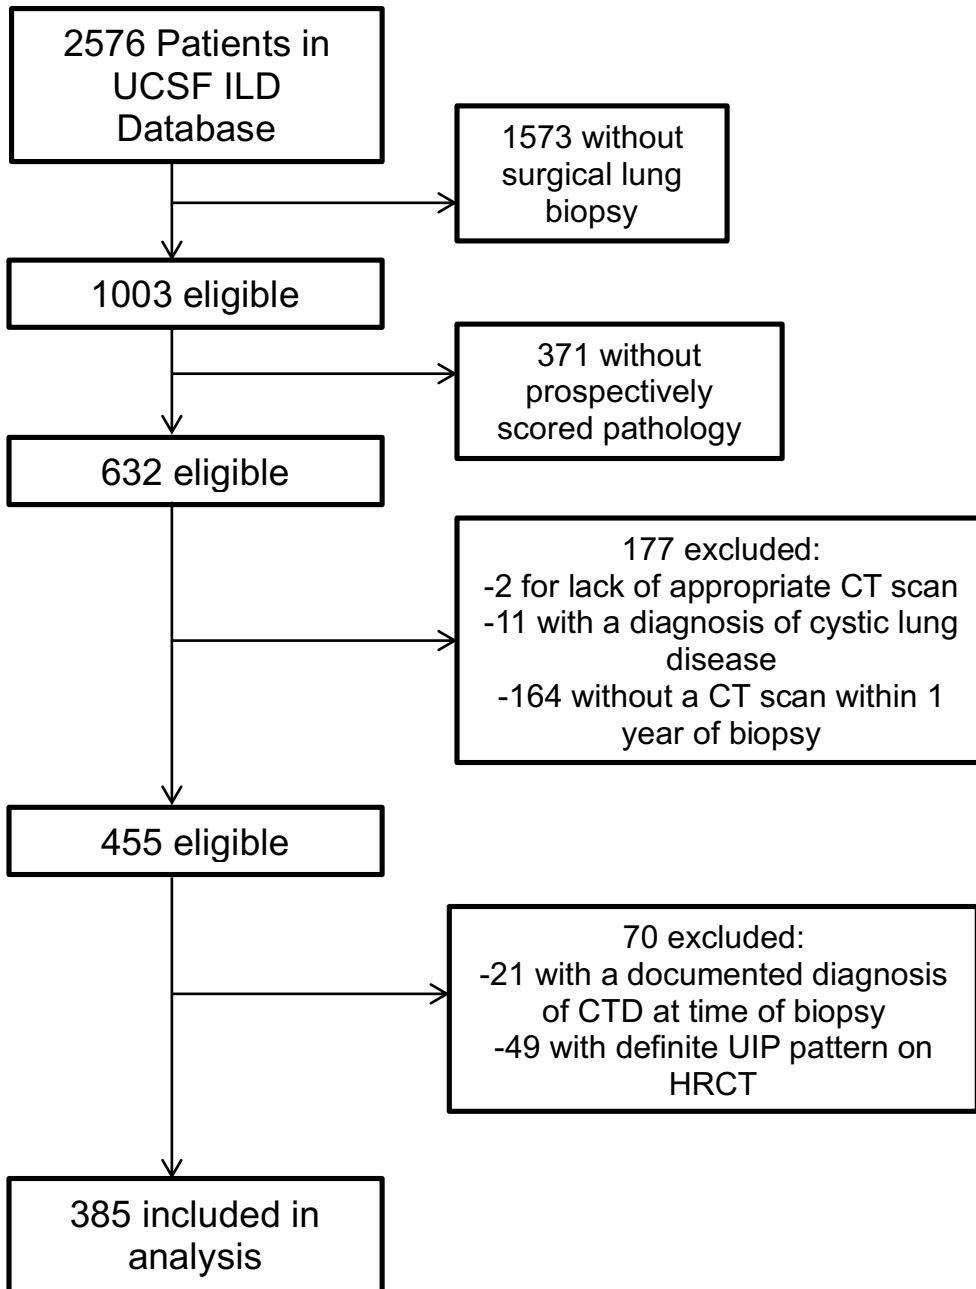

Figure 2. Derivation Cohort Patient selection flow chart

**Supplemental Figure 3.**

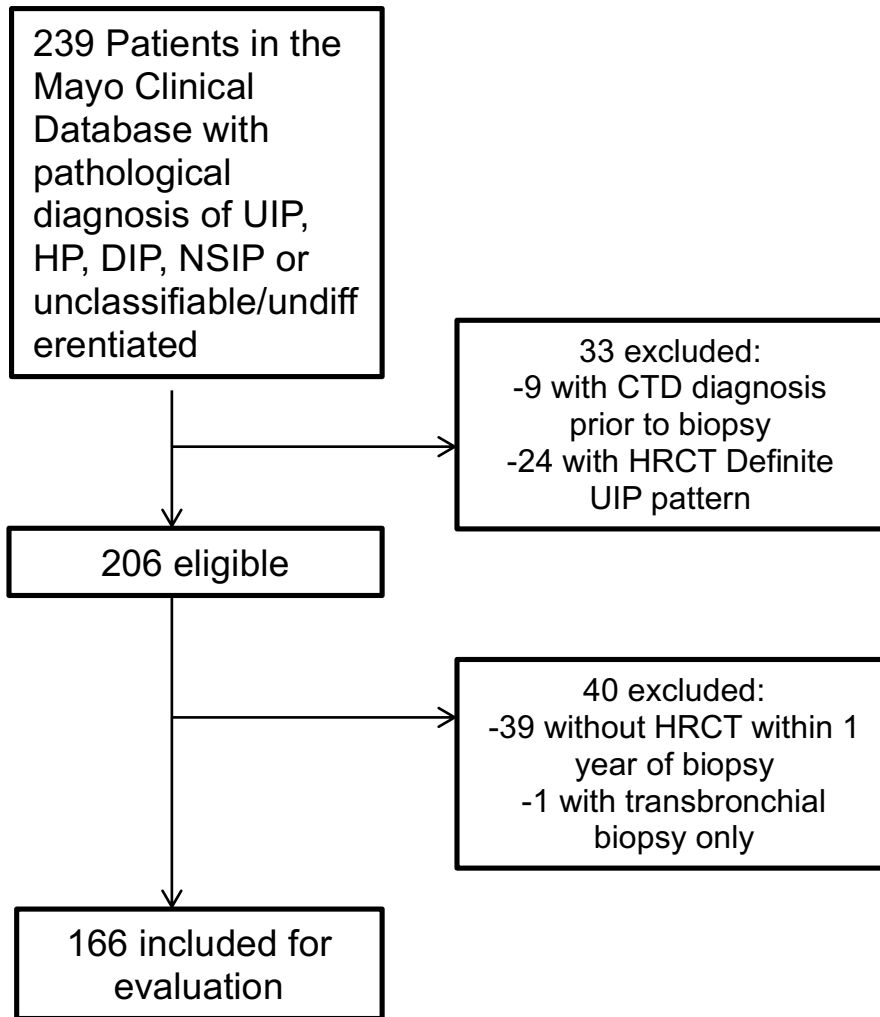

**Figure 3. Validation Cohort Patient selection flow chart**
